# Supplementary material
Source: PubMed Central journal article supplement (PMC4820734)
Supplement: jcav07p0576s1.pdf [file jcav07p0576s1.pdf]

**Table S1****Primer pairs used in regular PCR.**

| <b>Genes</b> | <b>Primers (F=forward, R=reverse)</b>                    | <b>Amplicons</b> |
|--------------|----------------------------------------------------------|------------------|
| Z38          | F: ATGGATAACCGTTTTGCT<br>R: TCATGCCACACGATATGC           | 762 bp           |
| Z38b         | F: ATGGGCGGTGATAGACTAGAGAAC<br>R: TCATGCCACACGATATGCCTTC | 831 bp           |
| Z38d         | F: ATGGGCGAGTCATTTGATGTGGT<br>R: TCATGCCACACGATATGCCTTC  | 477 bp           |

**Table S2****Primer pairs used in qRT-PCR analysis.**

| <b>Genes</b>   | <b>Primers (F=forward, R=reverse)</b>                  | <b>Amplicons</b> |
|----------------|--------------------------------------------------------|------------------|
| Z38            | F: AGTGGGATTGTGGAGACGGTGT<br>R: AGGTAAAAGGAACTGGCAACGC | 211 bp           |
| Z38b           | F: CCTCCTACA ACTCCCACAAG<br>R: TCTCTAGTCTATCACCGCCC    | 202 bp           |
| Z38d           | F: GGAGGATGGGCGAGTCATTT<br>R: CGATCAAAGCCCCAAAGCAC     | 192 bp           |
| $\beta$ -actin | F: TCCCTGGAGAAGAGCTACGA<br>R: AGCACTGTGTTGGCGTACAG     | 194 bp           |
| GAPDH          | F: AACGGATTTGGTCGTATTGGG<br>R: CCTGGAAGATGGTGATGGGAT   | 211 bp           |

**Figure S1.**

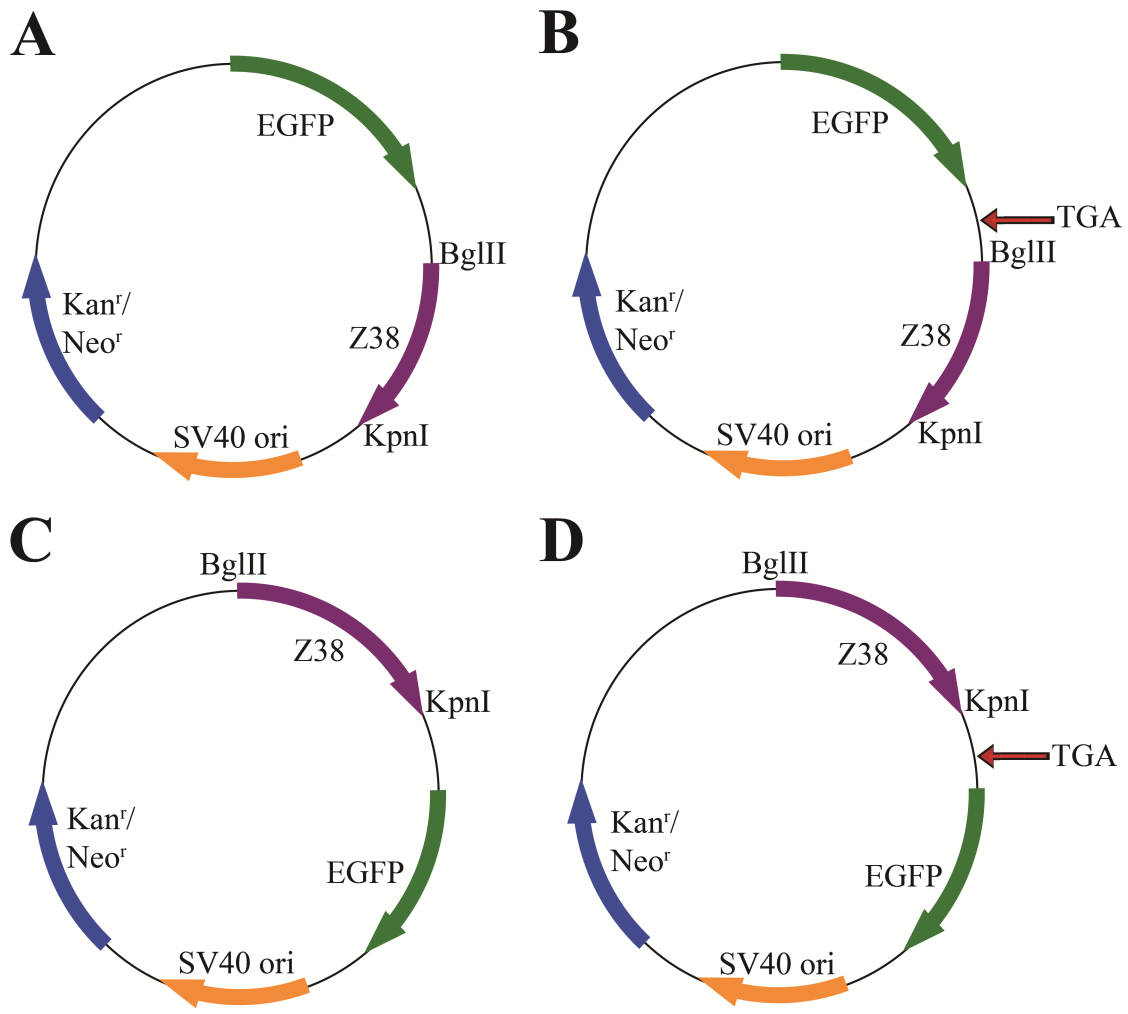

**Figure S1. The simulated structures of plasmids:** (A) pEGFP-C1-Z38, (B) pEGFP-C1-Z38(S), (C) pEGFP-N3-Z38, (D) pEGFP-N3-Z38(S). TGA is the terminator codon between the sequences of Z38 and EGFP.

BglIII and KpnI represent two kinds of endonucleases.
